# Supplementary material
Source: publisher figshare collection journal article supplement (https://frontiersin.figshare.com/ndownloader/files/20174753)
Supplement: Supplementary file 1 [file 20174753]

**Table S1.** Definitions of ecological terminologies used.

|                           | <b>Definition</b>                                                                                                                                                                                                                                                                                                                           |
|---------------------------|---------------------------------------------------------------------------------------------------------------------------------------------------------------------------------------------------------------------------------------------------------------------------------------------------------------------------------------------|
| <i>Density</i>            | Measure of the number of organisms in a defined area.                                                                                                                                                                                                                                                                                       |
| <i>Biomass</i>            | The total weight of organisms in a given area or volume.                                                                                                                                                                                                                                                                                    |
| <i>Species diversity</i>  | The number of different species that are represented in a given community. Species diversity consists of two components: species richness and species evenness. <i>Species richness</i> is a simple count of species, whereas <i>species evenness</i> quantifies how equally the individuals in a community are distributed across species. |
| <i>Target species</i>     | Species primarily sought by the fishermen in a particular fishery.                                                                                                                                                                                                                                                                          |
| <i>Non-target species</i> | Species that are not specifically targeted by a particular fishery but that may be incidentally captured as part of the targeted catch.                                                                                                                                                                                                     |
